# Supplementary material
Source: MDPI journal article supplement (https://www.mdpi.com/2077-0472/13/4/858)
Supplement: s1 [file s1 › agriculture-2310394-supplementary.pdf]

# Effects of Five-Year Inorganic and Organic Fertilization on Soil Phosphorus Availability and Phosphorus Resupply for Plant P Uptake during Maize Growth

Jingjing Zhang<sup>1</sup>, Jiong Wen<sup>2</sup>, Tuo Zhang<sup>1</sup>, Yang Zhang<sup>1,2</sup>, Zhi Peng<sup>2</sup>, Chunchun Tang<sup>2</sup>, Yanan Wang<sup>1,2</sup>, Shiming Su<sup>1,2</sup>, Nan Zhang<sup>1</sup>, Xibai Zeng<sup>1,2,\*</sup>

<sup>1</sup> Key Laboratory of Agro-Environment, The Ministry of Agriculture of China, Institute of Environment and Sustainable Development in Agriculture, Chinese Academy of Agricultural Sciences, Beijing, 100081, China

<sup>2</sup> Yueyang Agricultural Environment Scientific Experiment Station, Ministry of Agriculture, Yueyang, 414000, China

\* Correspondence: zengxibai@caas.cn

## **Supplement Material (SM)**

### **Materials and Method SM 2.1**

The pH (material: water, 1: 2.5) was determined by a Thunder pH meter (INESA, Shanghai, China). Total C and total N were directly measured by using a Vario Max CN elemental analyzer (Elementar, Langenselbold, Germany). Total P, K, Fe, Al, Ca, Mg was digested with  $\text{H}_2\text{SO}_4\text{--H}_2\text{O}_2$  and determined by inductively coupled plasma–mass spectrometry (ICP–MS) following digestion of the materials [1].

The available N was mainly extracted with 1M NaOH and then determined by the acidometer titration. The available P was extracted with 0.5M  $\text{NaHCO}_3$  (pH 8.5) and quantified by molybdate colorimetry at 800 nm using a spectrophotometer. The available K was extracted with 0.1 M  $\text{NH}_4\text{COOH}$  and then determined by the ICP–MS. The details of these methods and the process about the determination of the available N, P and K can be found in the Lu, et al (2020) [2].

[1] Thomas, R.L., Sheard, R.W., Moyer, J.R., 1967. Comparison of conventional and automated procedures for nitrogen, phosphorus, and potassium analysis of plant material using a single digest. *Agron. J.* 59, 240–243.

[2] Lu, R.K., 2000. Analysis method of soil agricultural chemistry, China Agricultural Science and Technology, Beijing.”

### Supplement Figures ( Figures S1–S2)

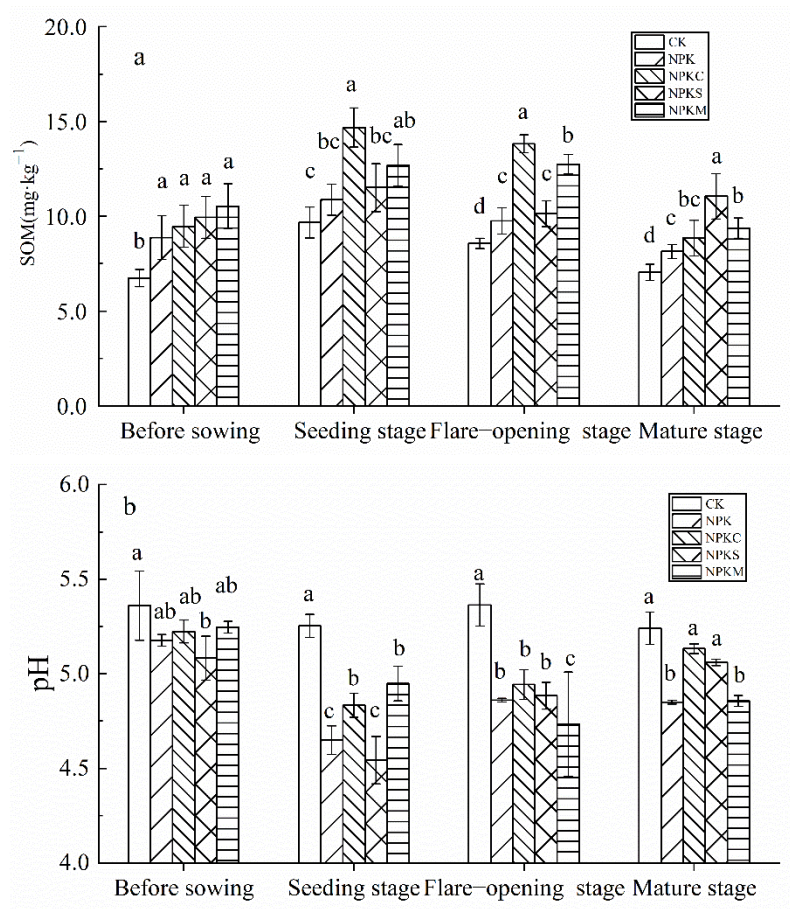

**Figure S1** Effects of fertilizer application on a) SOM and b) pH at different growth stages. Error bars refer to  $\pm$  SD. Different letters listed in a stage indicate significant differences between treatments at  $p < 0.05$ .

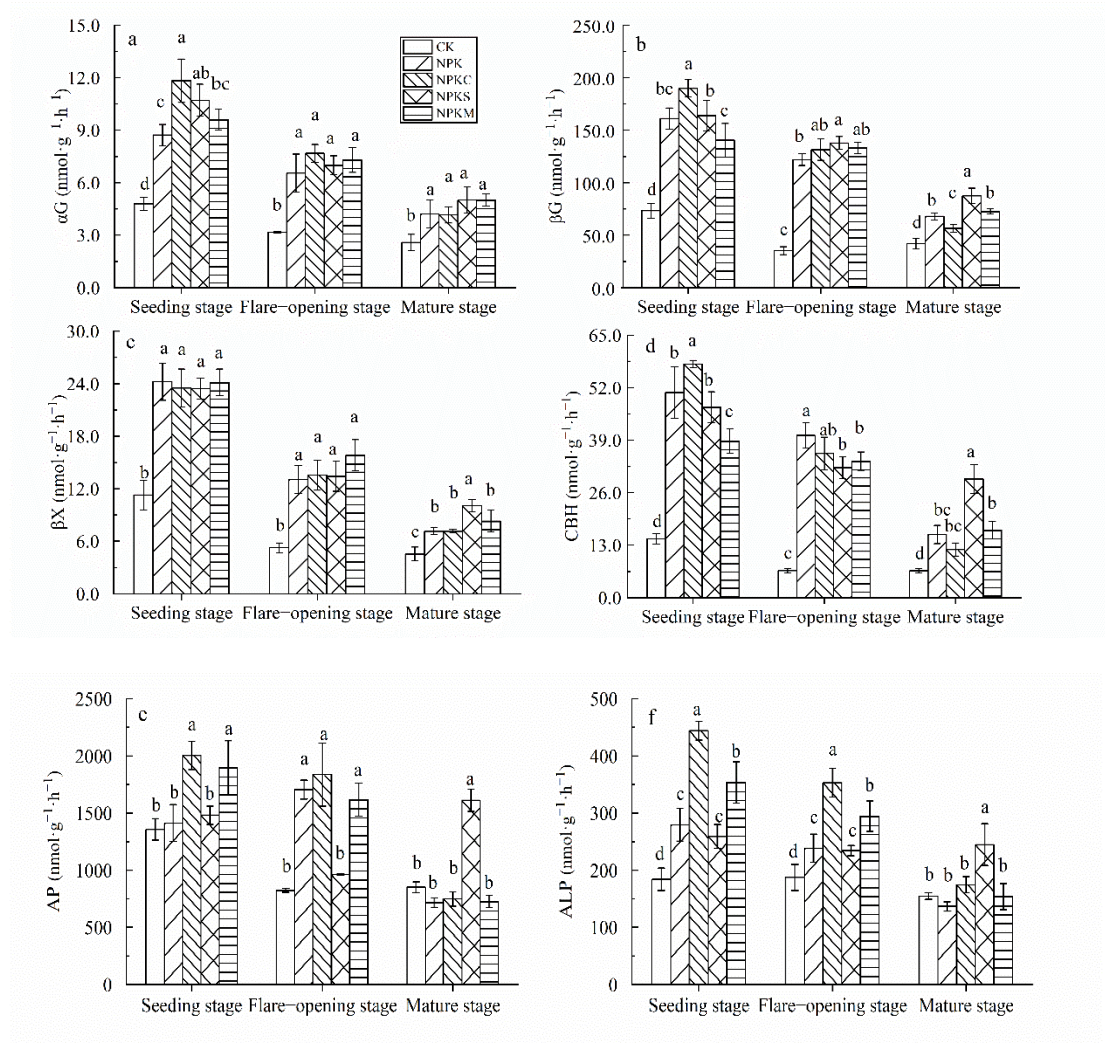

**Figure S2** Effects of fertilizer application on soil enzyme activities at different growth stages. a):  $\alpha$ -1,4-glucosidase ( $\alpha$ G); b):  $\beta$ -1,4-glucosidase ( $\beta$ G); c)  $\beta$ -1,4-xylosidase ( $\beta$ X); d): cellobiohydrolase (CBH); e) acid phosphatase (ACP); f): alkaline phosphatase (ALP). Error bars refer to  $\pm$  SD. Different letters listed in a stage indicate significant differences between treatments at  $p < 0.05$ .

## Supplement Tables (Table S1)

**Table S1** Relationship between the P decrease and soil properties using Pearson's method.

|                    | pH      | SOM   | DPS    | Fe <sub>ox</sub> | Al <sub>ox</sub> | Fe <sub>PP</sub> | Al <sub>PP</sub> |
|--------------------|---------|-------|--------|------------------|------------------|------------------|------------------|
| ΔFe-P <sup>a</sup> | -.783** | 0.428 | 0.587  | -0.456           | -0.033           | 0.413            | 0.611            |
| ΔAl-P <sup>b</sup> | -.656** | 0.607 | .809** | -0.392           | 0.030            | .869**           | 0.328            |
| ΔT-P <sup>c</sup>  | -.816** | 0.529 | .718*  | -0.478           | -0.015           | 0.606            | 0.574            |

<sup>a</sup> The amount of the decrement of soil Fe-P between maize growth stages.

<sup>b</sup> The amount of the decrement of soil Al-P between maize growth stages.

<sup>c</sup> The total amount of the decrement of soil Fe-P and Al-P between maize growth stages.
